# Supplementary material
Source: PubMed Central journal article supplement (PMC9199042)

## Supplemental materials for

Hallur S, Sandhu S, Herold E, et al. Embedding student volunteer Affordable Care Act navigators in a primary care clinic. *Ann Fam Med*. 2022;20:Online.

*Shreyas Hallur*<sup>1,2,3</sup>

*Sahil Sandhu, MSc*<sup>1,3</sup>

*Emma Herold*<sup>1</sup>

*Ana Trejo*<sup>1</sup>

*Donna Rasmussen*<sup>4,5</sup>

*Nicholas Riggs, MPA*<sup>4,5</sup>

*H. Musa Ali*<sup>6</sup>

*Janet Prvu Bettger, ScD*<sup>3,7</sup>

<sup>1</sup>Trinity College of Arts & Sciences, Duke University, Durham, North Carolina

<sup>2</sup>Sanford School of Public Policy, Duke University, Durham, North Carolina

<sup>3</sup>Duke-Margolis Center for Health Policy, Duke University, Durham, North Carolina

<sup>4</sup>Legal Aid of North Carolina, Raleigh, North Carolina

<sup>5</sup>NC Navigator Consortium, Raleigh, North Carolina

<sup>6</sup>Lincoln Community Health Center, Durham, North Carolina

<sup>7</sup>Department of Orthopaedic Surgery, Duke University School of Medicine, Durham, North Carolina

## Supplementary Figure 1. Timelines of Student Navigator Program in 2019 and 2020

Note: Text in *Green Italics* indicate adjustments/additions made in 2020 due to the COVID-19 Pandemic

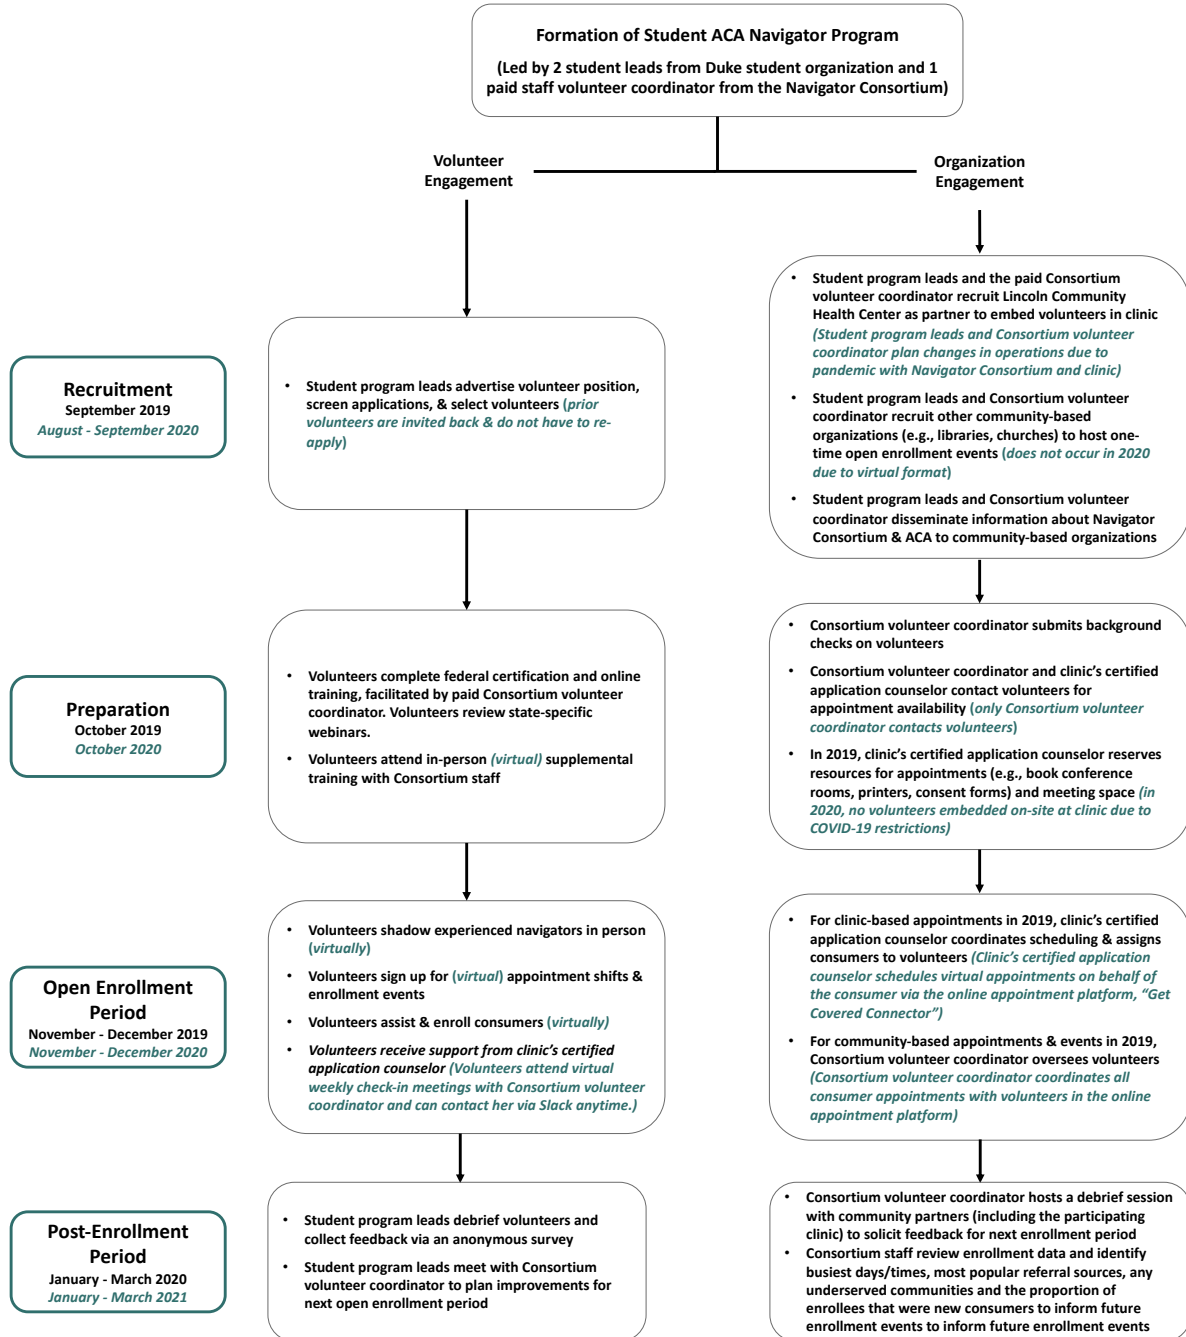

Supplementary Figure 2. Clinic Workflow for Student ACA Navigators Program

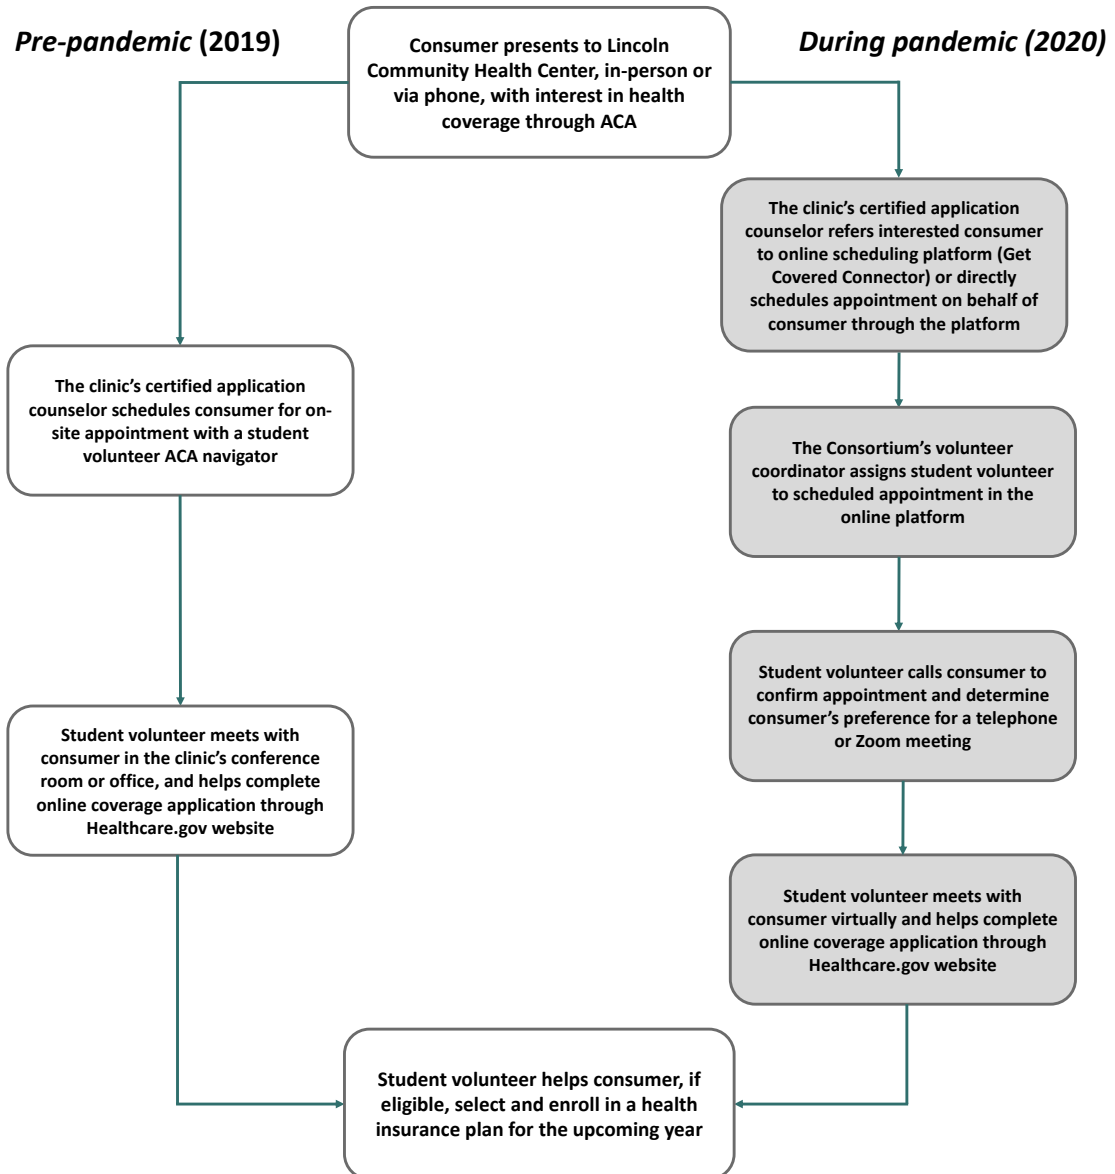

Supplement: HallurSupp.pdf [file HallurSupp.pdf]
